# Supplementary material
Source: Frontiers journal article supplement (https://www.frontiersin.org/articles/492352)
Supplement: Image_1.PDF [file Image_1.PDF]

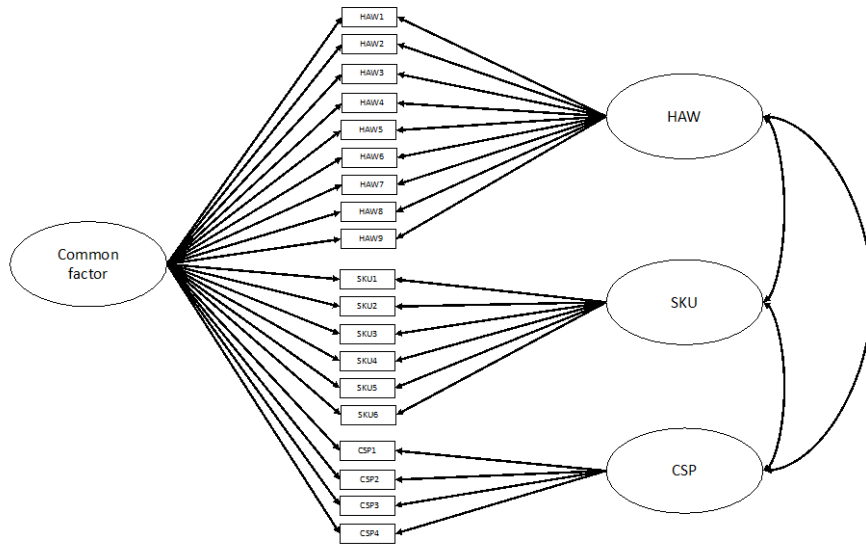

Graphic 1. Supplementary material. Common latent factor model.
